# Supplementary material
Source: PubMed Central journal article supplement (PMC166410)
Supplement: pnas_1432026100_1.pdf [file pnas_1432026100_1.pdf]

**Table 1. Comparative virulence of WT and *siaB* mutants of nontypable *Hemophilus influenzae* (NTHi), strains 375, 477, 285, and 162, in an experimental chinchilla model of otitis media (OM)**

| Strain                       | Inoculum size | Incidence OM*    | Day 1                 |                 | Days 2–3              |                 | Days 5–6                           |                 | Days 8–10                          |                 | Days 13–14            |                 | Days 17–19            |                 | Days 23–24            |                 |
|------------------------------|---------------|------------------|-----------------------|-----------------|-----------------------|-----------------|------------------------------------|-----------------|------------------------------------|-----------------|-----------------------|-----------------|-----------------------|-----------------|-----------------------|-----------------|
|                              |               |                  | CFU/ml <sup>†</sup>   | SE <sup>†</sup> | CFU/ml <sup>†</sup>   | SE <sup>†</sup> | CFU/ml <sup>†</sup>                | SE <sup>†</sup> | CFU/ml <sup>†</sup>                | SE <sup>†</sup> | CFU/ml <sup>†</sup>   | SE <sup>†</sup> | CFU/ml <sup>†</sup>   | SE <sup>†</sup> | CFU/ml <sup>†</sup>   | SE <sup>†</sup> |
| 375                          | ≈50           | 11/11            | 4.5 × 10 <sup>5</sup> | 2.3             | 1.1 × 10 <sup>7</sup> | 2.9             | 1.3 × 10 <sup>7</sup>              | 1.8             | 1.1 × 10 <sup>6</sup>              | 3.1             | 2.5 × 10 <sup>5</sup> | 3.4             | 8.2 × 10 <sup>4</sup> | 3.5             | 2.1 × 10 <sup>2</sup> | 2.1             |
| 477                          | ≈100          | 2/2              | –                     | –               | 4.1 × 10 <sup>6</sup> | 3.4             | 2.6 × 10 <sup>6</sup>              | 1.7             | 5.2 × 10 <sup>6</sup>              | 1               | 9.5 × 10 <sup>5</sup> | 1.9             | 0                     | –               | 0                     | –               |
| 285                          | ≈100          | 2/2              | –                     | –               | 3.1 × 10 <sup>3</sup> | 2.6             | 5.0 × 10 <sup>6</sup>              | 1               | 5.1 × 10 <sup>5</sup>              | 13              | 2.0 × 10 <sup>4</sup> | 20              | 0                     | –               | 0                     | –               |
| 162                          | ≈100          | 2/2              | –                     | –               | 7.1 × 10 <sup>6</sup> | 1.4             | 8.5 × 10 <sup>6</sup>              | 1.1             | 6.6 × 10 <sup>5</sup>              | 6.6             | 2.2 × 10 <sup>7</sup> | 2.2             | 1.7 × 10 <sup>6</sup> | 1.2             | 0                     | –               |
| 375 <i>siaB</i>              | ≈50           | 2/6              | 0                     | –               | 0                     | –               | 1.2 × 10 <sup>3</sup> <sup>‡</sup> | 12              | 1.1 × 10 <sup>3</sup> <sup>δ</sup> | 5.6             | 0                     | –               | 0                     | –               | –                     | –               |
| 477 <i>siaB</i> <sup>‡</sup> | ≈100          | 1/3 <sup>‡</sup> | –                     | –               | 1.0 × 10 <sup>8</sup> | –               | 1.0 × 10 <sup>8</sup>              | –               | 1.8 × 10 <sup>4</sup>              | –               | 0                     | –               | –                     | –               | –                     | –               |
| 285 <i>siaB</i>              | ≈100          | 0/3              | –                     | –               | 0                     | –               | 0                                  | –               | –                                  | –               | –                     | –               | –                     | –               | –                     | –               |
| 162 <i>siaB</i>              | ≈100          | 0/3              | –                     | –               | 0                     | –               | 0                                  | –               | –                                  | –               | –                     | –               | –                     | –               | –                     | –               |

\*Number of animals with OM (as evidenced by the presence of middle ear fluid and cultures of NTHi from the middle ear)/total number of chinchillas inoculated).

<sup>†</sup>Colony-forming units (cfu)/ml: geometric mean and SE of viable counts of *Hi* at various times (days after inoculation) as indicated; 0, no growth from middle ear fluid; –, absence of middle ear fluid for culture.

<sup>‡</sup>Viable counts obtained from single sample of middle ear exudate as only one chinchilla was infected.

<sup>δ</sup>Viable counts obtained from single sample of middle ear exudate as only one chinchilla was infected.
